# Supplementary material for: Comparative efficacy of fingolimod vs natalizumab: A French multicenter observational study
Source: PubMed Central journal article supplement — Neurology. 2016 Feb 23;86(8):771–8. doi: 10.1212/WNL.0000000000002395 (PMC4763805; doi:10.1212/wnl.0000000000002395), 2016-02-23
Supplement: supp_WNL.0000000000002395_Table_e-1.pdf [file supp_WNL.0000000000002395_Table_e-1.pdf]

**Supplementary Table e-1.** Baseline characteristics of non included and included relapsing-remitting multiple sclerosis patients. **A)** for the whole cohort of patients, **B)** for fingolimod-treated patients, and **C)** for natalizumab-treated patients.

| <b>A) Whole cohort of patients</b>                        | <b>Included (n=629)</b> | <b>Non included (n=184)</b> | <b>p value</b> |
|-----------------------------------------------------------|-------------------------|-----------------------------|----------------|
| Female –n-%                                               | 479 (76.2)              | 129 (70.1)                  | 0.1015         |
| Age at the treatment initiation, years-mean(SD)           | 37.0 (9.6)              | 38.6 (9.7)                  | 0.0413         |
| Disease duration at treatment initiation, years-mean (SD) | 8.5 (6.4)               | 9.9 (6.9)                   | 0.0138         |
| EDSS score-mean (SD)                                      | 2.6 (1.3)               | 2.6 (1.4)                   | 0.9939         |
| EDSS score of 3 to 5.5- n (%)                             | 288 (45.8)              | 77 (41.9)                   | 0.3552         |
| Patient with previous treatment <sup>a</sup> -n (%)       | 556 (88.4)              | 164 (89.1)                  | 0.8953         |
| Patients with relapse in the preceding year-n (%)         |                         |                             |                |
| ≥1 relapse                                                | 526 (83.6)              | 122 (66.3)                  | <0.0001        |
| ≥2 relapses                                               | 264 (42.0)              | 52 (28.3)                   | 0.0008         |

  

| <b>B) fingolimod-treated patients</b>                     | <b>Included (n=303)</b> | <b>Non included (n=100)</b> | <b>p value</b> |
|-----------------------------------------------------------|-------------------------|-----------------------------|----------------|
| Female- n (%)                                             | 225 (74.3)              | 73 (73)                     | 0.7941         |
| Age at the treatment initiation, years-mean(SD)           | 37.2 (9.2)              | 41.2 (9.3)                  | 0.0002         |
| Disease duration at treatment initiation, years-mean (SD) | 9.0 (6.8)               | 11.3 (7.0)                  | 0.0060         |
| EDSS score-mean (SD)                                      | 2.4 (1.3)               | 2.4(1.2)                    | 0.7861         |
| EDSS score of 3 to 5.5- n (%)                             | 122 (40.3)              | 34 (34)                     | 0.2880         |
| Patients with previous treatment <sup>a</sup> -n (%)      | 263 (86.8)              | 92 (92)                     | 0.2124         |
| Patients with relapse in the preceding year-n (%)         |                         |                             |                |
| ≥1 relapse                                                | 233 (76.9)              | 57(57)                      | 0.0002         |
| ≥2 relapses                                               | 92 (30.4)               | 21 (21)                     | 0.0737         |

  

| <b>C) natalizumab-treated patients</b>                    | <b>Included (n=326)</b> | <b>Non included (n=84)</b> | <b>p value</b> |
|-----------------------------------------------------------|-------------------------|----------------------------|----------------|
| Female-n (%)                                              | 254 (77.9)              | 56 (66.7)                  | 0.0453         |
| Age at the treatment initiation, years-mean(SD)           | 36.8 (9.9)              | 35.6 (9.4)                 | 0.0474         |
| Disease duration at treatment initiation, years-mean (SD) | 8.0 (6.1)               | 8.4 (6.6)                  | 0.3956         |

|                                                      |            |           |        |
|------------------------------------------------------|------------|-----------|--------|
| EDSS score-mean (SD)                                 | 2.8 (1.3)  | 2.9(1.5)  | 0.1055 |
| EDSS score of 3 to 5.5- n (%)                        | 166 (50.9) | 43 (51.2) | 1.0000 |
| Patients with previous treatment <sup>a</sup> -n (%) | 293 (89.9) | 72 (85.7) | 0.3264 |
| Patients with relapse in the preceding year-n (%)    |            |           |        |
| ≥1 relapse                                           | 293 (89.9) | 65 (77.4) | 0.0050 |
| ≥2 relapses                                          | 172 (52.8) | 31 (36.9) | 0.0103 |

---
