# Supplementary material for: Comparative efficacy of fingolimod vs natalizumab: A French multicenter observational study
Source: PubMed Central journal article supplement — Neurology. 2016 Feb 23;86(8):771–8. doi: 10.1212/WNL.0000000000002395 (PMC4763805; doi:10.1212/wnl.0000000000002395), 2016-02-23
Supplement: supp_WNL.0000000000002395_Table_e-2.pdf [file supp_WNL.0000000000002395_Table_e-2.pdf]

**Supplementary Table e-2.** Clinical activity at one year of treatment according to MRI missing data at one year. **A)** in the whole cohort of patients, **B)** in fingolimod-treated patients and **C)** in natalizumab-treated patients.

| <b>A) whole cohort of patients</b>                             | <b>Without missing MRI data at 1year (n=351)</b> | <b>With missing MRI data at 1year (n=278)</b> | <b>p value</b> |
|----------------------------------------------------------------|--------------------------------------------------|-----------------------------------------------|----------------|
| Patients with at least one year of treatment-n (%)             | 287 (81.8)                                       | 252 (90.7)                                    | 0.0019         |
| Patients with relapse within the first year of treatment-n (%) |                                                  |                                               |                |
| ≥1 relapse                                                     | 108 (30.8)                                       | 43 (15.5)                                     | <0.0001        |
| ≥2 relapses                                                    | 26(7.4)                                          | 5 (1.8)                                       | 0.0013         |
| EDSS score after one year of treatment-mean(SD)                | 2.5(1.4)                                         | 2.3(1.4)                                      | 0.0838         |
| Patients with increase EDSS after one year-n (%)               | 97 (29.0)                                        | 36 (18.4)                                     | 0.0069         |

  

| <b>B)fingolimod-treated patients</b>                           | <b>Without missing MRI data at 1year (n=143)</b> | <b>With missing MRI data at 1year (n=160)</b> | <b>p value</b> |
|----------------------------------------------------------------|--------------------------------------------------|-----------------------------------------------|----------------|
| Patients with at least one year of treatment-n (%)             | 111(77.6)                                        | 143 (89.4)                                    | 0.0075         |
| Patients with relapse within the first year of treatment-n (%) |                                                  |                                               |                |
| ≥1 relapse                                                     | 52(36.4)                                         | 30 (18.8)                                     | 0.0007         |
| ≥2 relapses                                                    | 13(9.1)                                          | 3 (1.9)                                       | 0.0081         |
| EDSS score after one year of treatment-mean(SD)                | 2.3 (1.4)                                        | 2.1(1.4)                                      | 0.3973         |
| Patients with increase EDSS after one year -n (%)              | 47(34.8)                                         | 18 (14.6)                                     | 0.0002         |

  

| <b>C)natalizumab-treated patients</b>                           | <b>Without missing MRI data at 1year (n=208)</b> | <b>With missing MRI data at 1year (n=118)</b> | <b>p value</b> |
|-----------------------------------------------------------------|--------------------------------------------------|-----------------------------------------------|----------------|
| Patients with at least one year of treatment-n (%)              | 176 (84.6)                                       | 109 (92.4)                                    | 0.0549         |
| Patients with relapse within the first year of treatment- n (%) |                                                  |                                               |                |
| ≥1 relapse (%)                                                  | 56 (26.9)                                        | 13(11.0)                                      | 0.0007         |
| ≥2 relapses (%)                                                 | 13(6.3)                                          | 2(1.7)                                        | 0.0954         |
| EDSS score after one year of treatment-mean(SD)                 | 2.6 (1.4)                                        | 2.5 (1.4)                                     | 0.5172         |
| Patients with increase EDSS after one year- n (%)               | 50 (25.1)                                        | 18 (24.7)                                     | 1.0000         |
